# Supplementary material for: Insights into the Toxicological Properties of a Low Molecular Weight Fraction from Zoanthus sociatus (Cnidaria)
Source: Mar Drugs. 2013 Aug 13;11(8):2873–81. doi: 10.3390/md11082873 (PMC3766870; doi:10.3390/md11082873)

## Supplemental Information

**Figure S1.** Matrix assisted laser desorption/ionization time-of fly/time-of-fly (MALDI-TOF/TOF) mass spectra (MS) of the fraction ZsG50-III obtained in positive linear mode from 700 Da to 12,000 Da. The majority of the signal corresponded to compounds with molecular weight below 1000 Da.

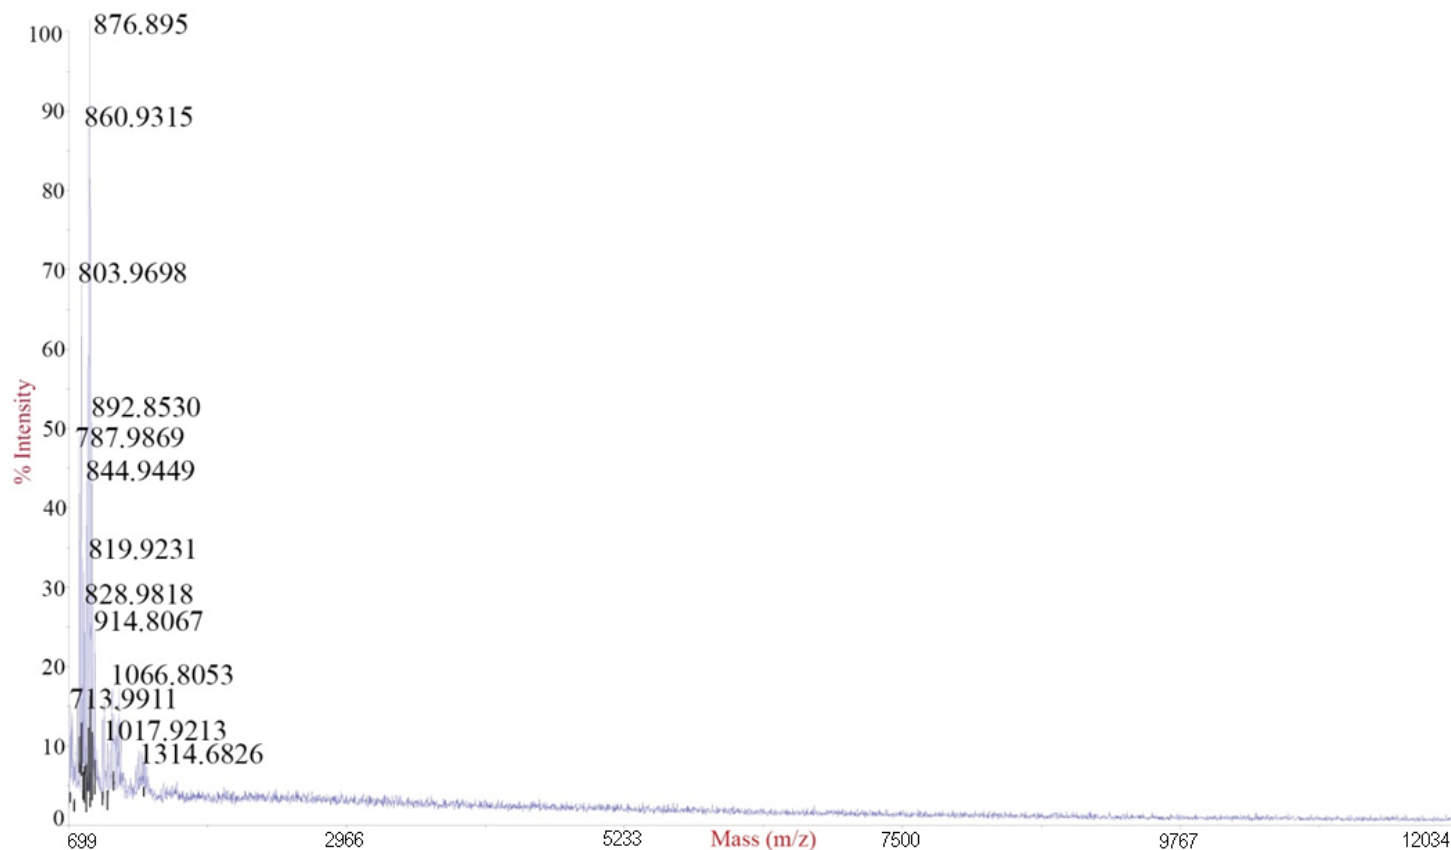

**Figure S2.** Sequencing profile of peak 876.98 of MALDI-TOF/TOF MS of the fraction ZsG50-III.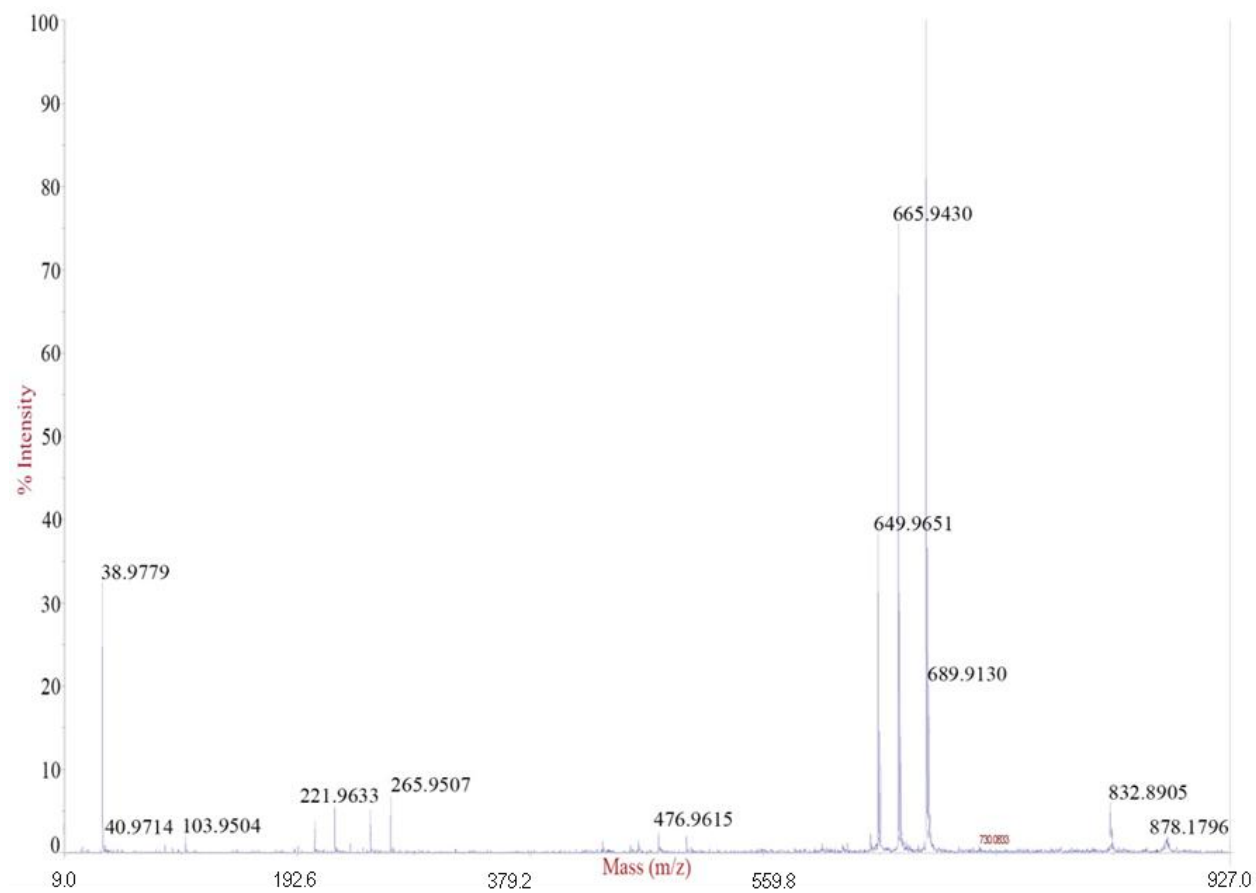

**Figure S3.** Sequencing profile of peak 1066.8053 of MALDI-TOF/TOFMS of the fraction ZsG50-III.

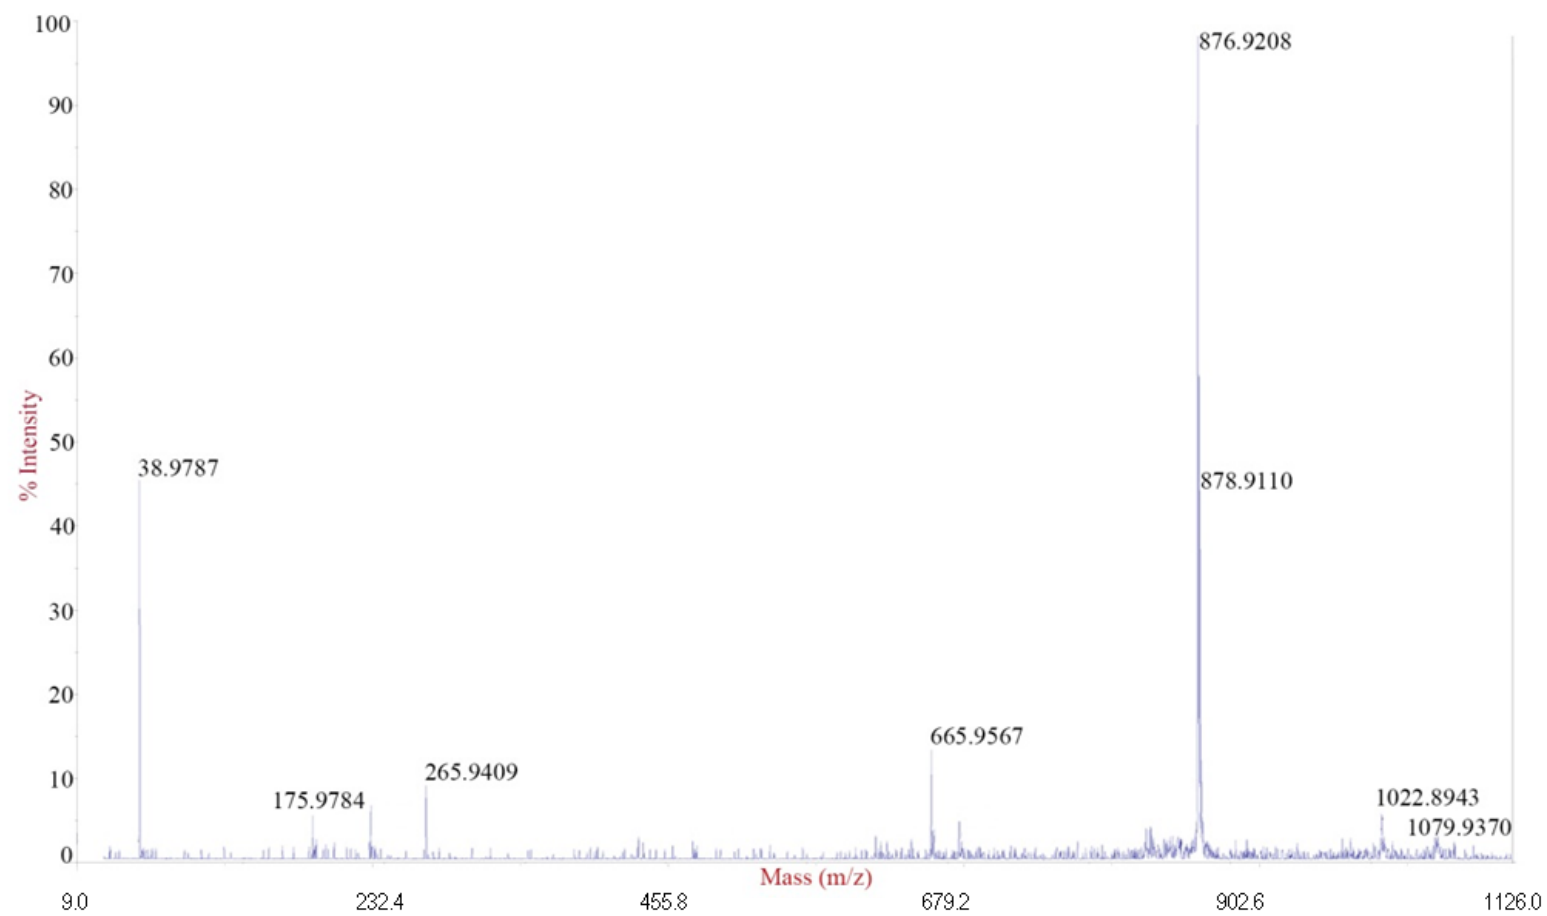

**Figure S4.** MS/MS analysis in reflector positive mode of minor peaks between 2000 and 4000 Da, obtained by MALDI-TOF/TOF MS from the fraction ZsG50-III.

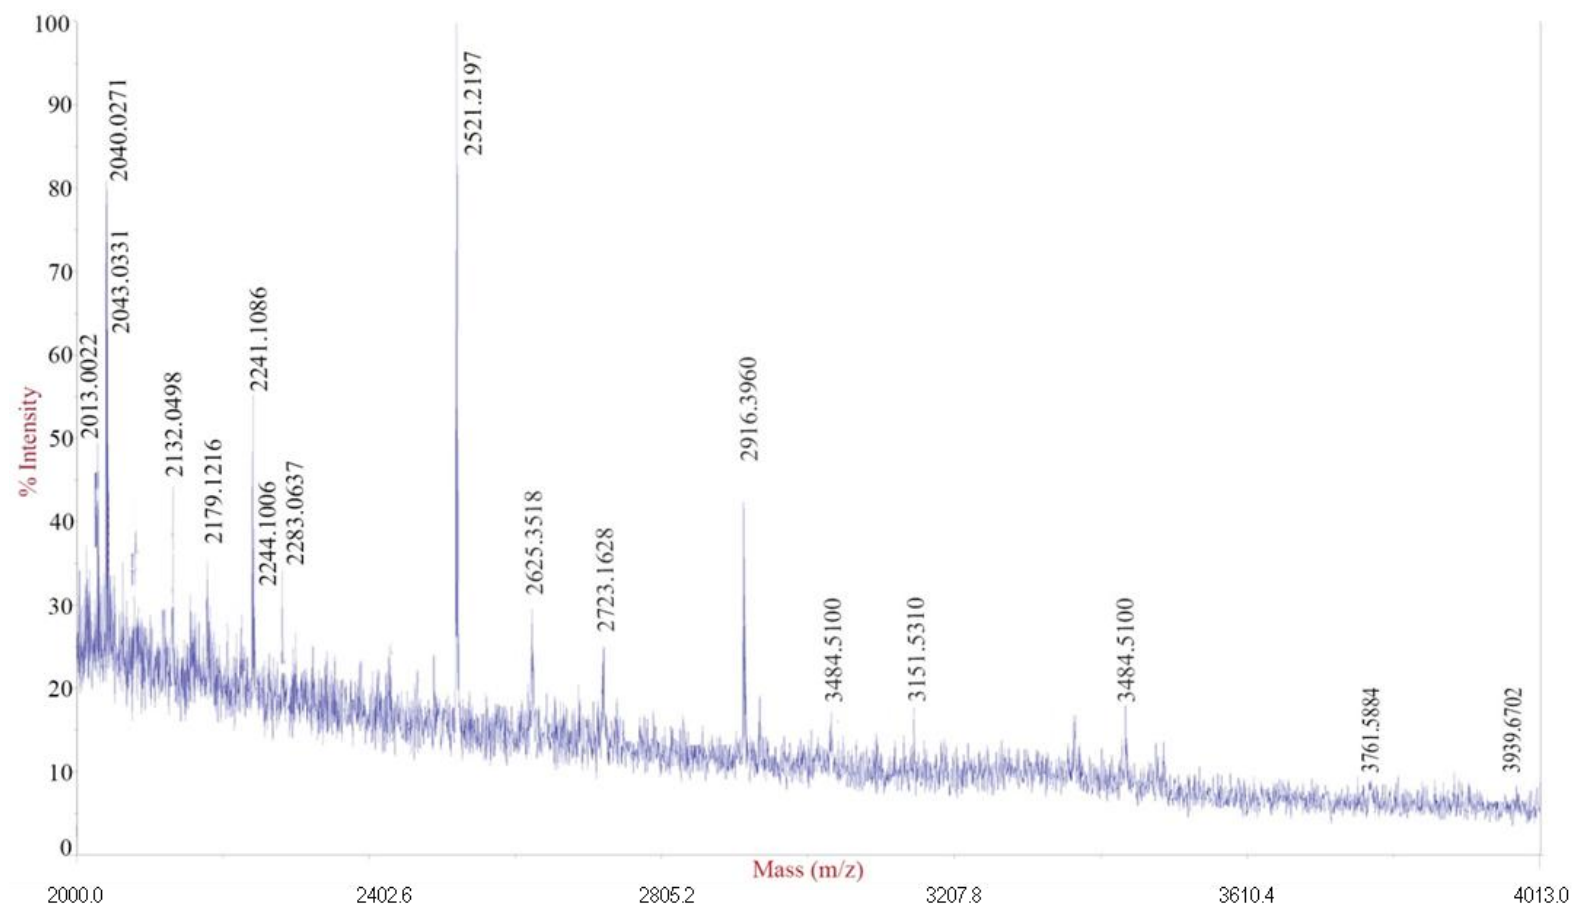

Supplement: Supplementary File 1 — Supplemental Information (PDF, 240 KB) [file marinedrugs-11-02873-s001.pdf]
